# Supplementary material
Source: publisher site journal article supplement (https://www.spandidos-publications.com/7217/downloadSupplementary)

Figure S1. Results of gene expression, cell apoptosis and cell proliferation assays. (A) *ESR1* was downregulated, whereas *ABCB1* was upregulated in MCF7-TR cells compared with in non-TR controls, as detected by reverse transcription-quantitative PCR. (B) Propofol significantly promoted the apoptosis of MCF7-TR cells. MCF7-TR cells were treated with 10 or 20  $\mu\text{M}$  propofol for 24 h, stained with PI and Annexin V, and apoptosis was detected using flow cytometry. (C) Percentage of Annexin V<sup>+</sup> and PI<sup>-</sup> early apoptotic cells, and Annexin V<sup>+</sup> and PI<sup>+</sup> late apoptotic cells. (D) Propofol significantly inhibited the proliferation of MCF7 cells. MCF7-TR and non-TR controls were treated with 2.5  $\mu\text{M}$  of propofol for 24, 48, 72 and 96 h, and were incubated with 10  $\mu\text{l}$  Cell Counting Kit-8 for 1 h before the absorbance was measured using a spectrophotometer. Data are presented as the mean  $\pm$  SD. Significant differences were examined using a (A) two-tailed Student's t-test, (C) one-way ANOVA or (D) two-way ANOVA. \* $P < 0.05$ , \*\* $P < 0.01$ , \*\*\* $P < 0.001$ . ABCB1, ATP binding cassette subfamily B member 1; ESR1, estrogen receptor 1; TR, tamoxifen-resistant.

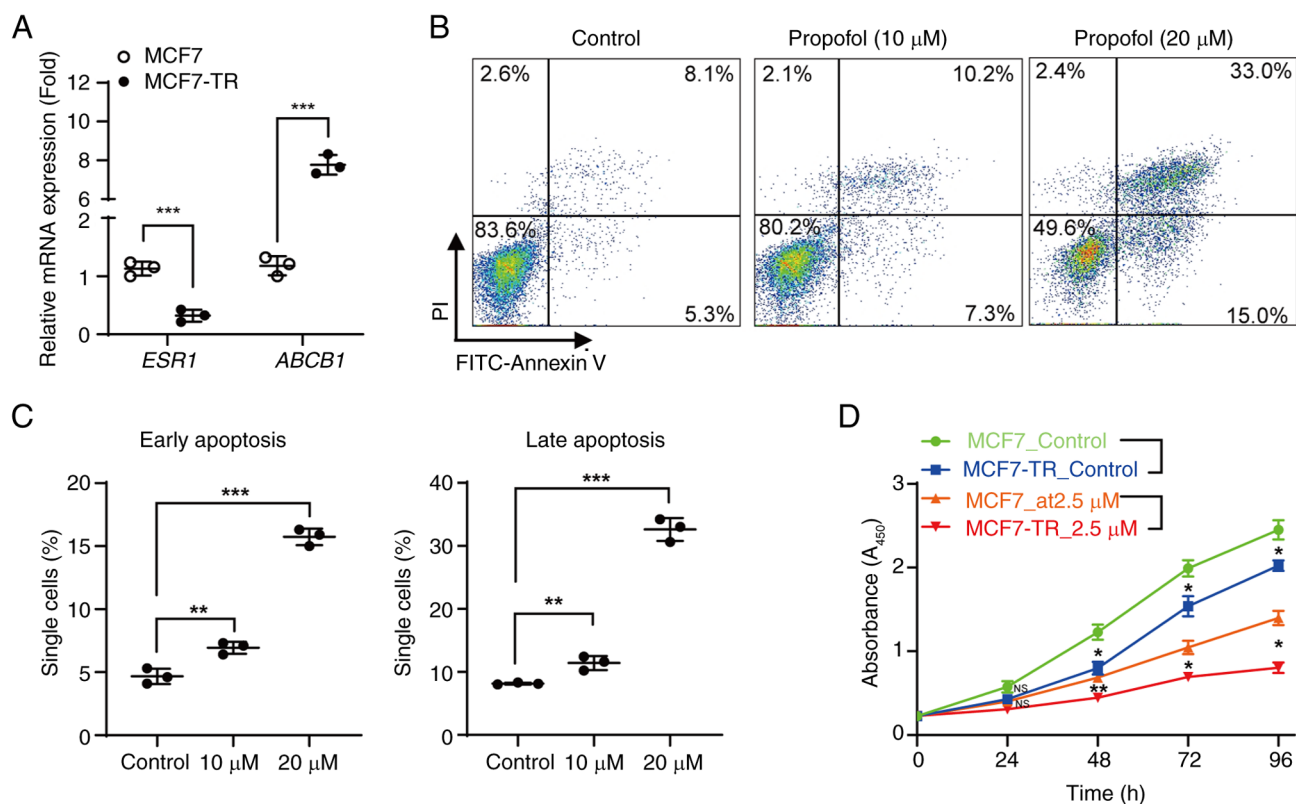

Supplement: Supplementary file 1 [file downloadSupplementary]
